# Supplementary material for: Sustainable Biodiesel Production from a New Oleaginous Fungus, Aspergillus carneus Strain OQ275240: Biomass and Lipid Production Optimization Using Box–Behnken Design
Source: MDPI journal article supplement (doi:10.3390/su15086836), 2023-04-18
Supplement: s1 [file s1]

**Table S1.** Analysis of variance for the response surface models for dry biomass, lipid content and lipid yield of *A. carneus*.

| Source                                   | Dry Biomass |    |        |         |                  | Lipid Content |    |       |         |                  | Lipid Yield |    |      |         |                  |
|------------------------------------------|-------------|----|--------|---------|------------------|---------------|----|-------|---------|------------------|-------------|----|------|---------|------------------|
|                                          | SS          | df | MS     | F Value | p-Value Prob.> F | SS            | df | MS    | F Value | p-Value Prob.> F | SS          | df | MS   | F Value | p-Value Prob.> F |
|                                          |             |    |        |         |                  |               |    |       |         |                  |             |    |      |         |                  |
| <b>Model</b>                             | 0.0322      | 7  | 0.0046 | 16.82   | 0.0015 *         | 2371.0        | 7  | 338.7 | 6.90    | 0.016 *          | 194.6       | 6  | 58.2 | 6.45    | 0.013 *          |
| <b>Residual</b>                          | 0.0016      | 6  | 0.0003 |         |                  | 294.7         | 6  | 49.1  |         |                  | 35.21       | 7  | 5.03 |         |                  |
| <b>Lack of Fit</b>                       | 0.0016      | 5  | 0.0003 | 6.36    | 0.292 **         | 293.5         | 5  | 58.7  | 45.49   | 0.112 **         | 34.63       | 6  | 5.77 | 9.79    | 0.24 **          |
| <b>Pure Error</b>                        | 0.0001      | 1  | 0.0001 |         |                  | 1.3           | 1  | 1.3   |         |                  | 0.59        | 1  | 0.59 |         |                  |
| <b>Correlation Total</b>                 | 0.0338      | 13 |        |         |                  | 2665.8        | 13 |       |         |                  | 229.80      | 13 |      |         |                  |
| <b>R<sup>2</sup></b>                     |             |    |        | 0.952   |                  |               |    |       | 0.889   |                  |             |    |      | 0.847   |                  |
| <b>adjusted-R<sup>2</sup></b>            |             |    |        | 0.895   |                  |               |    |       | 0.760   |                  |             |    |      | 0.715   |                  |
| <b>predicted-R<sup>2</sup></b>           |             |    |        | 0.607   |                  |               |    |       | 0.123   |                  |             |    |      | 0.179   |                  |
| <b>Adeq. Precision</b>                   |             |    |        | 12.26   |                  |               |    |       | 8.716   |                  |             |    |      | 9.295   |                  |
| <b>Coefficient of variation (C.V. %)</b> |             |    |        | 27.42   |                  |               |    |       | 55.28   |                  |             |    |      | 43.76   |                  |
| <b>Mean</b>                              |             |    |        | 0.06    |                  |               |    |       | 12.68   |                  |             |    |      | 5.12    |                  |

df: Degree of freedom; SS: Sum of Squares; MS: Mean Square; \* Significant values; \*\* Non-significant values.
